# Supplementary material
Source: ML conference proceedings conference paper supplement (https://openaccess.thecvf.com/content/ICCV2025/html/Zhang_Ultra_High-Resolution_Image_ICCV_2025_paper.html)
Supplement: Supplementary file 1 [file Zhang_Ultra_High-Resolution_Image_ICCV_2025_supplemental.pdf]

# Ultra High-Resolution Image Inpainting with Patch-Based Content Consistency Adapter

## Supplementary Material

### 1. More details.

**Random Mask.** During training, our random masks are generated via three distinct strategies: (i) using a brush that emulates human strokes; (ii) employing random geometric shapes—such as rectangles and ellipses with arbitrary positions and sizes; and (iii) composing composite shapes by overlapping several random geometric forms. See the Fig. 8.

**Hierarchical text prompting.** As illustrated in the Fig. 9, we present local patch-specific prompt examples annotated via the Vision-Language Models (VLM). This text-guided strategy effectively ensures the plausibility of fine-grained content details.

**Reference Patch Selection Strategy.** As illustrated in Algorithm 1, our reference patch retrieval process locates semantically consistent regions in the original image by measuring the cosine similarity between CLIP embeddings of candidate patches and the masked region, thereby optimizing reference information through feature-space proximity. The semantic distance is exclusively determined by this cosine metric, which effectively captures the semantic alignment between patches.

**Additional ablation study for fairness.** As shown in Tab. 4, we conducted experiments on the same dataset and training-setting (Sec.4.3), comparing (i) *full-parameter UNet fine-tuning*, (ii) *LoRA fine-tuning*, and (iii) *DCA* (we proposed).

#### Algorithm 1 Reference Patch Selection Strategy.

```

1: Input: Upsampled stage 1 Output Patches which is masked
    $X_m$ , Original Patches  $X_{orig}$ , Clip model  $\mathcal{C}$ 
2: Output: Reference Patches  $X_{ref}$ 
3: for Masked Patch  $X_m^i$  in  $X_m$  do
4:   Compute CLIP embedding  $\mathcal{C}(X_m^i)$ 
5:    $d_{max} \leftarrow -1$ ,  $X_{BestMatch} \leftarrow \emptyset$ 
6:   for Original Patch  $X_{orig}^j$  in  $X_{orig}$  do
7:     Compute CLIP embedding  $\mathcal{C}(X_{orig}^j)$ 
8:     Compute distance  $d \leftarrow \frac{\mathcal{C}(X_m^i)^\top \mathcal{C}(X_{orig}^j)}{\|\mathcal{C}(X_m^i)\|_2 \|\mathcal{C}(X_{orig}^j)\|_2}$ 
9:     if  $d > d_{max}$  then
10:       $d_{max} \leftarrow d$ ,  $X_{BestMatch} \leftarrow X_{orig}^j$ 
11:     end if
12:   end for
13:    $X_{ref}^i \leftarrow X_{BestMatch}$ 
14: end for
15: Return Reference Patches  $X_{ref}$ 

```

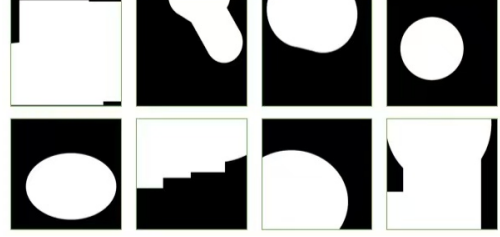

Figure 8. Random masks strategies.

### 2. Additional Qualitative Results.

**Comparison with Super-Resolution Models Integrated with Blend Diffusion.** Our analysis of state-of-the-art super-resolution models integrated with blend diffusion, as illustrated in the Fig. 10, reveals that these approaches often fail to maintain fine-detail consistency between masked and unmasked regions, leading to unpredictable, low-quality textures and conspicuous seams. In contrast, our model effectively leverages information from the unmasked areas and inter-patch cues to integrate global image coherence, resulting in aesthetically pleasing inpainting outcomes.

**Under both global and local text prompts.** We present a qualitative evaluation (see Fig. 11) comparing our model with and without the Dual Context Adapter (DCA) module. Our results demonstrate that, although the DCA module is fine-tuned exclusively with global text, its integration as an attention-based plug-in does not adversely affect the baseline model. In fact, in most cases, the model with DCA exhibits an enhanced understanding of the image context.

**Additional qualitative evaluations.** Against other inpainting models are presented in Fig. 12, Our two-stage model demonstrates outstanding performance by optimizing both contextual understanding and fine detail generation.

| Model Name                | Random Masks and Global Prompt      |                   |               |              |
|---------------------------|-------------------------------------|-------------------|---------------|--------------|
|                           | FID ↓                               | Aesthetic score ↑ | CLIP Score ↑  | LPIS ↓       |
| SDXL-I                    | 13.326                              | 5.480             | 26.268        | 0.129        |
| SDXL-I + LoRA-fine-tuning | 13.284                              | 5.376             | 26.119        | 0.150        |
| SDXL-I + UNet-fine-tuning | 13.168                              | 5.405             | 26.249        | 0.152        |
| DCA(Ours)                 | <b>12.167</b>                       | <b>5.591</b>      | <b>26.458</b> | <b>0.128</b> |
| Model Name                | Segmentation Masks and Local Prompt |                   |               |              |
|                           | FID ↓                               | Aesthetic score ↑ | CLIP Score ↑  | LPIS ↓       |
| SDXL-I                    | 9.565                               | 5.559             | 26.990        | 0.092        |
| SDXL-I + LoRA-fine-tuning | 9.725                               | 5.415             | 26.581        | 0.091        |
| SDXL-I + UNet-fine-tuning | 9.683                               | 5.445             | 26.684        | 0.093        |
| DCA(Ours)                 | <b>9.427</b>                        | <b>5.598</b>      | <b>27.002</b> | <b>0.089</b> |

Table 4. Following the DCA ablation (Sec.4.3), we fine-tuned SDXL-Inpainting under identical settings to enable a fair comparison with our DCA module.

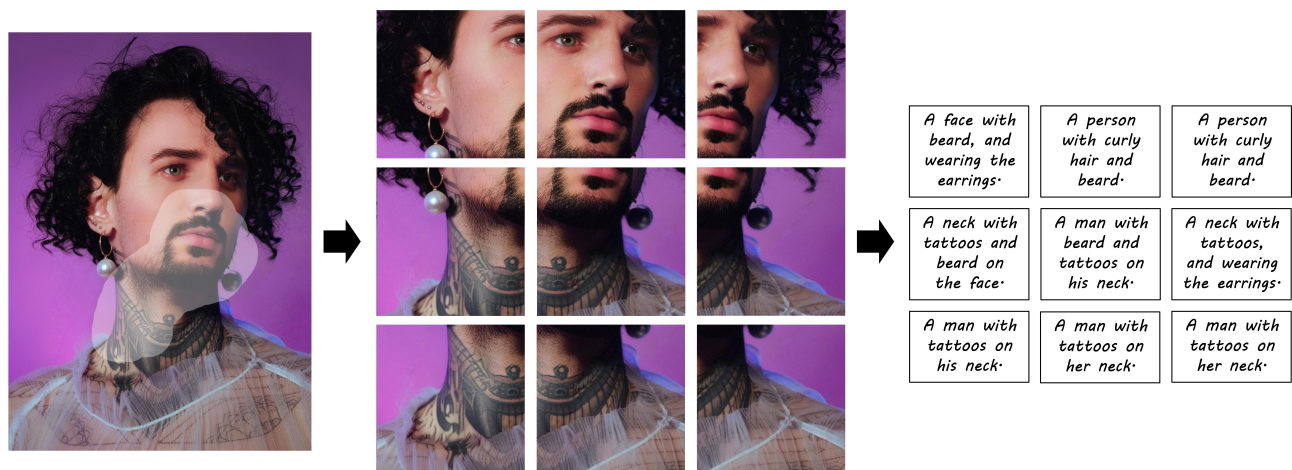

Figure 9. Each patch is assigned a dedicated prompt via the VLM, and overlaps between patches are introduced during segmentation to ensure coherent generation.

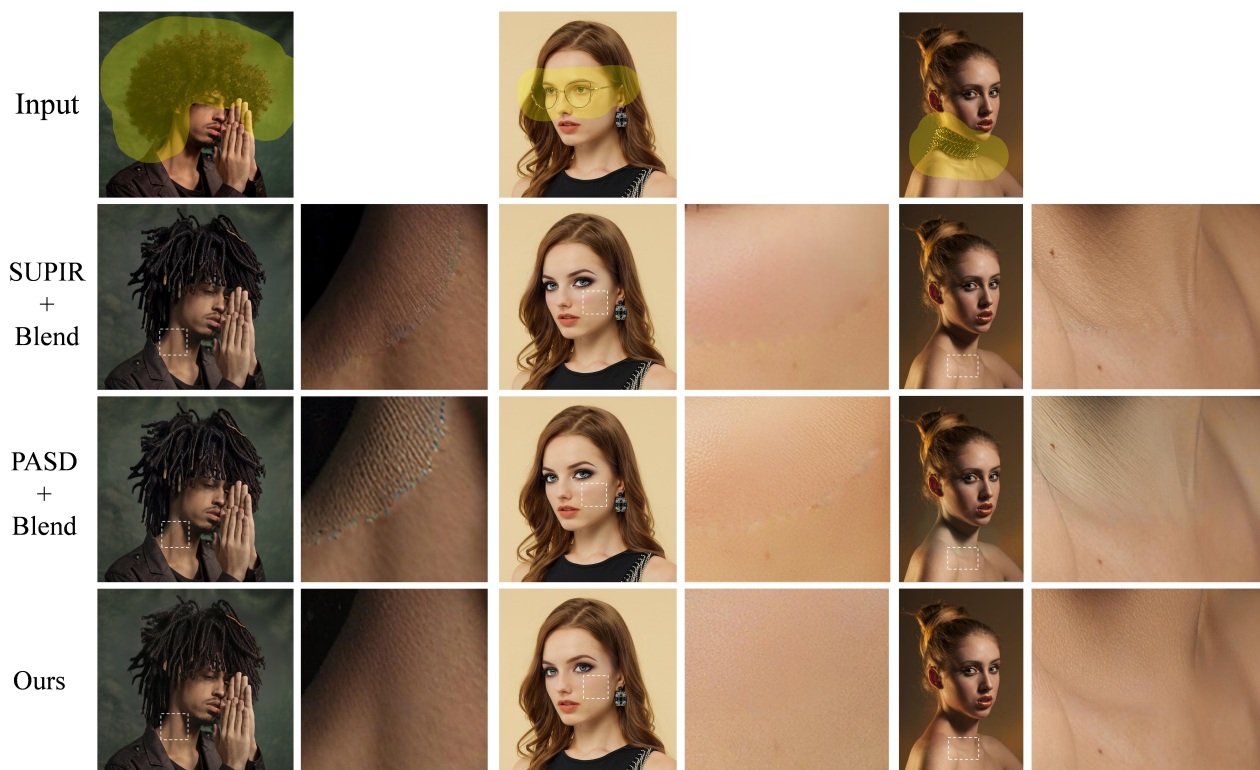

Figure 10. Compare with super-resolution generation models combined with blend diffusion. These methods often fail to account for the context inside and outside the masked regions, leading to issues such as texture inconsistencies, seams, and color discrepancies.



| Input                                                                               | <i>Local Prompt</i>                                                                 |                                                                                     | <i>Global Prompt</i>                                                                 |                                                                                       |
|-------------------------------------------------------------------------------------|-------------------------------------------------------------------------------------|-------------------------------------------------------------------------------------|--------------------------------------------------------------------------------------|---------------------------------------------------------------------------------------|
|                                                                                     | Without DCA                                                                         | With DCA                                                                            | Without DCA                                                                          | With DCA                                                                              |
| 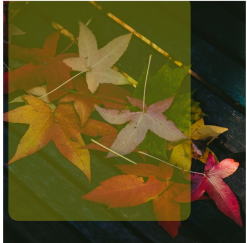   | <i>Leaf.</i>                                                                        |                                                                                     | <i>The orange-red maple leaves fall on wooden benches.</i>                           |                                                                                       |
|                                                                                     |    |    |    |    |
|    | <i>A black-browed albatross.</i>                                                    |                                                                                     | <i>A black-browed albatross lying on the grass, another one standing next to it.</i> |                                                                                       |
|                                                                                     |    |    |    |    |
|   | <i>ground, nothing.</i>                                                             |                                                                                     | <i>There is a sofa in the room and a gray floor.</i>                                 |                                                                                       |
|                                                                                     |   |   |   |   |
|  | <i>Grassland.</i>                                                                   |                                                                                     | <i>A vast meadow with some trees surrounding the border in the distance.</i>         |                                                                                       |
|                                                                                     |  |  |  |  |
|  | <i>Empty skatepark with graffiti.</i>                                               |                                                                                     | <i>An empty skatepark overlooking the ocean, adorned with vibrant graffiti art.</i>  |                                                                                       |
|                                                                                     |  |  |  |  |

Figure 11. By fine-tuning DCA with global text prompt, we enhance the model’s utilization of image context via a plugin-based approach, without compromising its inherent ability to comprehend short local texts.



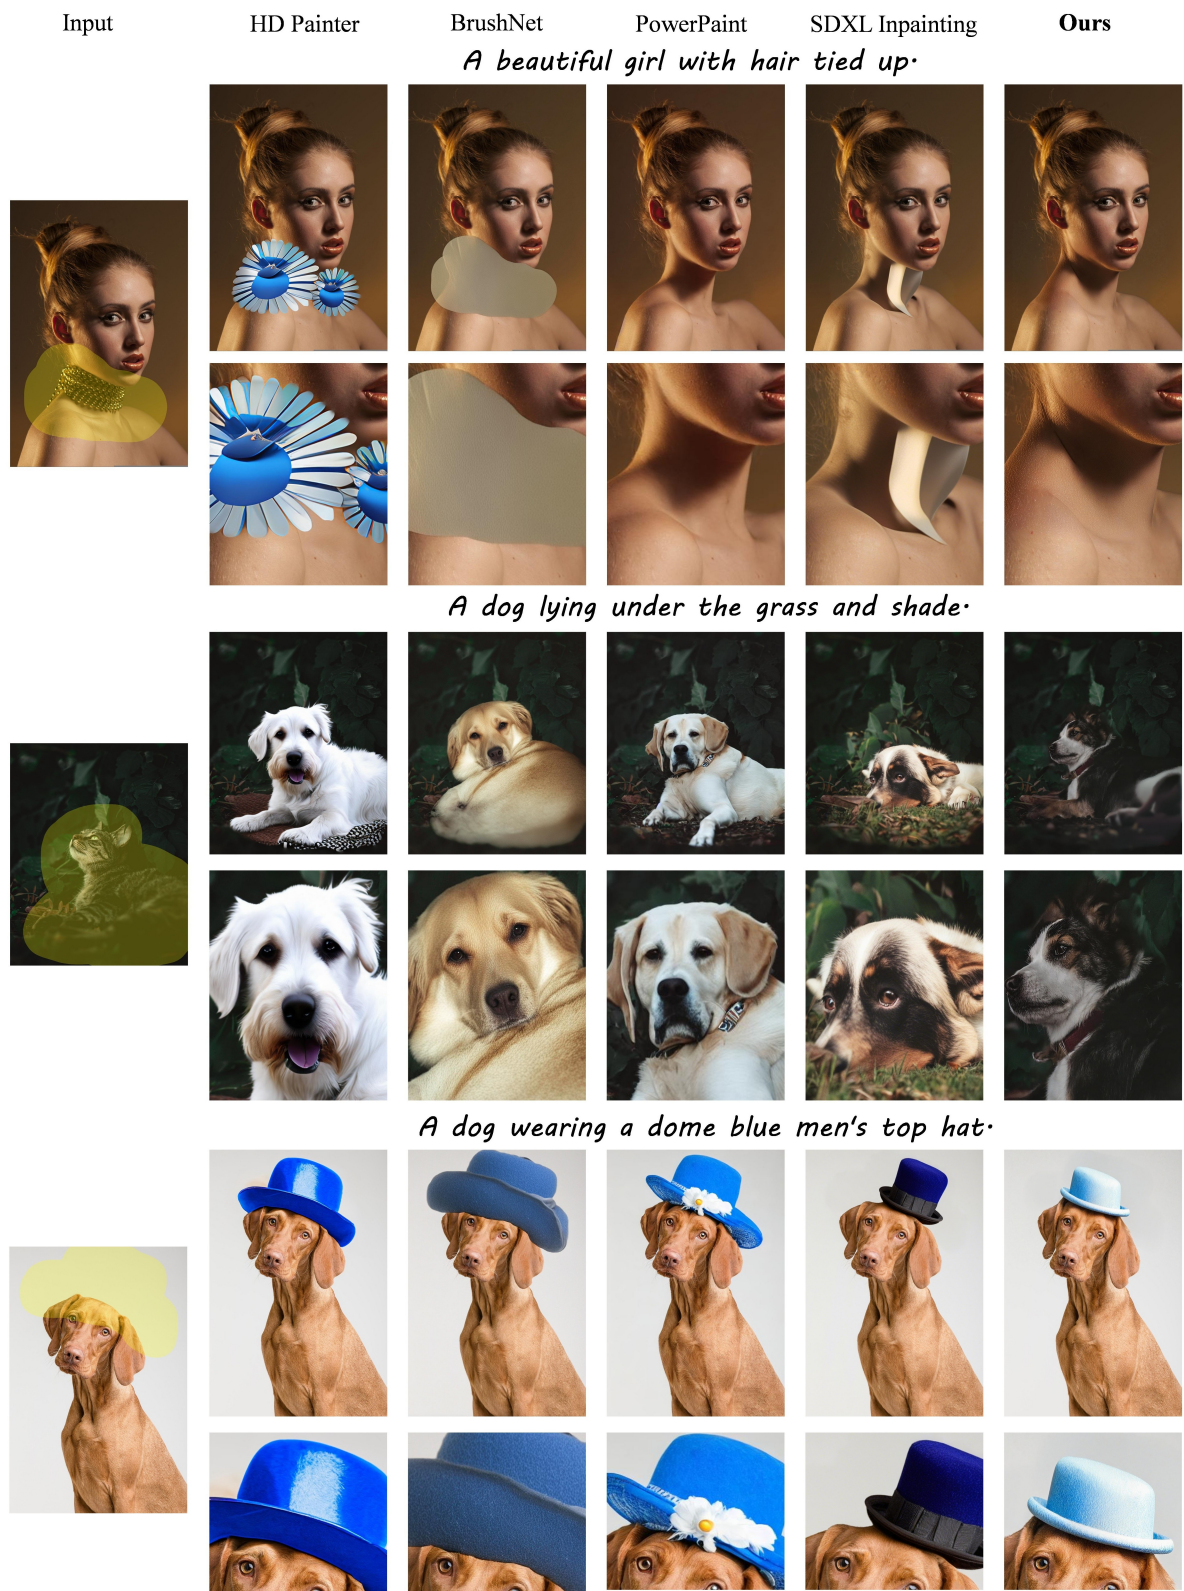

Figure 12. Our model preserves both the structural correctness and aesthetic quality of the content while generating more refined details, ensuring that high-resolution inpainting outputs faithfully match the original image’s level of detail.
